# Supplementary material
Source: PubMed Central journal article supplement (PMC2668419)
Supplement: supp_191_8_2728__1.pdf [file supp_191_8_2728__1.pdf]

**Table S1**

| <b>Primer name</b> | <b>Sequence (5'– 3')</b>               |
|--------------------|----------------------------------------|
| OSM125             | CGTTCCCCCTCTGCAGGCTTATTACTATAATATG     |
| OSM139             | CCTATTTTCAGTCGACTAGTTTTAGAAC           |
| OSM166             | GAGGGTGAGCTCATGAGGATATATTTTCAG         |
| OSM167             | GAAATAGGTACCCATTATGATTTGTTTACCC        |
| OSM168             | GAAGCTGAGCGCAGTATTCTTATTGAGAG          |
| OSM169             | CCACATGGTACCAATCTTAATTCAACAATTTTC      |
| OSM170             | GAGAGGAGCTCTTAAGGGGAATCTGAGATTAG       |
| OSM171             | CATATATTGCATCTCCACCATCATAATAAATAGG     |
| OSM172             | GTTGAGGAGCTCTTAAGACTAGTAGCAC           |
| OSM173             | GGACTTGGTACCTCTGACATCTTTTTATAA         |
| OKM9               | GCTGAGGGATCCGTTGCTGCGTCTTC             |
| OKM11              | CTAATCTCGAATTCCCCTTAATAAATTTCTCTCTAG   |
| OKM12              | GATAGAGGATCCGGAGGTGGAAATACTG           |
| OKM14              | CTAATATCTGCAGGTCAATATATACAG            |
| OKM15              | GAACTTATAGTCGACGAATACATTTTCATTG        |
| OKM19              | 6-FAM-CTCTCTTGTAATTATTGTATCTTTTAAGATC  |
| OKM22              | 6-FAM-CCAGTTAAAAATATTTTACTACCAACTAATTC |
| OKM23              | GCTGTTTTTCTTATAGTAGCCC                 |
| OKM34              | GAAGGTTGCTTTGTAAAATAGAGCATCAAAATGG     |
| OJV11              | GGTTAGAACATGAAATATTGCGCCC              |
| OJV12              | GGTGATATAAAAACACAGAGGG                 |
| OJV13              | CCTGTATTGAATTTTCAACAGCC                |
| OJV18              | CGATGCACAAATATTTCTGTTTCC               |
| OJV22              | GTCTCCAAATCTCTCATTTC                   |

**Figure S1. Primer extension results for the *spoIIGA-sigE* operon.** (A) The chromatograms show peak fluorescence of the 5'-6 FAM labeled RT-PCR product for *spoIIGA* obtained from capillary electrophoresis. Electrophoresis of standard markers are shown in red, primer extension products in blue. Numbers above each peak indicate the length of the product. Note that the peaks at positions 83 and 98 are within the coding sequence of *spoIIGA* and were not considered to be true transcription start sites. (B) The putative transcription start site is indicated on the sequence by an arrow labeled P1 and underlined bold text. The initiator methionine for *spoIIGA* is shown in bold italics.

**A**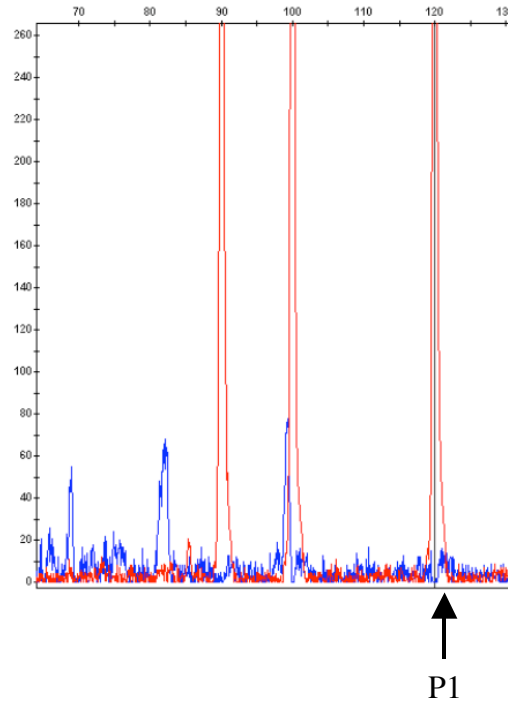**B**

**P1**  
 ↓  
 AAAAAATGAAAGAAAAGAAAGAGAGAAAATATGCATATGGAA  
 TATATAATGACAAAATTTTAGAATAAGAAGCTTTATAATTATA  
 AATAGGGAGTGAGTTGATTTATGACTGTATATATTGACATTGT  
 CATATTAGAAAATTTTTTAATTAACTTTTTCTACTTTATTTAA  
 CTTTACAGATCTTAAAAGATACAATAATT (*spoIIIGA...*)

**Figure S2. Primer extension results for the *sigK* gene.** (A) The chromatograms show peak fluorescence of the 5'-6 FAM labeled RT-PCR product for *sigK* obtained from capillary electrophoresis. Electrophoresis of standard markers are shown in red, primer extension products in blue. Numbers above each peak indicate the length of the product. (B) The putative transcription start sites are indicated on the sequence by arrows labeled P1 and P2 and underlined bold text. The initiator methionine for *sigK* and the stop codon for *CPR\_1739* are shown in bold italics.

**A**

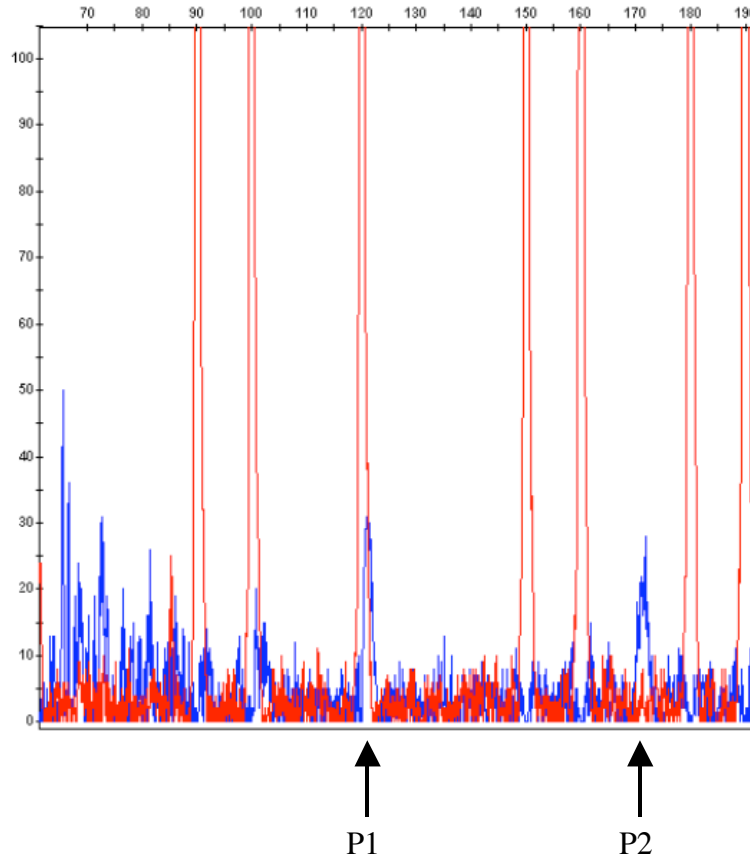

**B**

P2  
P1

(CPR\_1739)...AATGTTTATGAAGATAGAAAGCCAGGAGGTGGAA  
ATACTGCAGGTCCTATTTTCAGAGATATAGTTTTAGAACTTACAA  
AAAAAATAGATTTAGCAATATTTTAACTATCAACTCATATTAT  
AGTAATAAGCATTAAATAGGGGGAACGATATGTTCATG(*sigK*...)
